# Supplementary material for: Bone Marrow Osteoblast Damage by Chemotherapeutic Agents
Source: PLOS journal article supplement (doi:10.1371/journal.pone.0030758), 2012-02-17

A.

| GeneName     | Description                                                                                     |
|--------------|-------------------------------------------------------------------------------------------------|
| THC2673554   | Alu subfamily J sequence                                                                        |
| AF227517     | sprouty-4C mRNA, complete cds. [AF227517]                                                       |
| IL1B         | interleukin 1, beta (IL1B), mRNA [NM_000576]                                                    |
| BCL2A1       | BCL2-related protein A1 (BCL2A1), transcript variant 1, mRNA [NM_004049]                        |
| A_32_P206561 | Unknown                                                                                         |
| CCL20        | chemokine (C-C motif) ligand 20 (CCL20), mRNA [NM_004591]                                       |
| NR4A3        | nuclear receptor subfamily 4, group A, member 3 (NR4A3), transcript variant 2, mRNA [NM_173198] |
| RASD1        | RAS, dexamethasone-induced 1 (RASD1), mRNA [NM_016084]                                          |
| THC2674068   | Q4S8B2_TETNG (Q4S8B2) Chromosome undetermined SCAF14706                                         |
| AA837799     | cDNA clone IMAGE:1385153, mRNA sequence [AA837799]                                              |
| THC2560068   | High mobility group protein HMGI-C (High mobility group AT-hook protein 2)                      |
| THC2727302   | Alu subfamily SP sequence                                                                       |
| LOC390595    | cDNA FLJ13740 fis, clone PLACE3000199. [AK023802]                                               |
| PHLDA1       | pleckstrin homology-like domain, family A, member 1 (PHLDA1), mRNA [NM_007350]                  |
| ANKRD10      | ankyrin repeat domain 10 (ANKRD10), mRNA [NM_017664]                                            |
| AY831680     | HC1 (HC1) mRNA, complete cds. [AY831680]                                                        |
| NUAK1        | NUAK family, SNF1-like kinase, 1 (NUAK1), mRNA [NM_014840]                                      |
| EEPD1        | endonuclease/exonuclease/phosphatase family domain containing 1 (EEPD1)                         |
| RNF128       | ring finger protein 128 (RNF128), transcript variant 1                                          |

B.

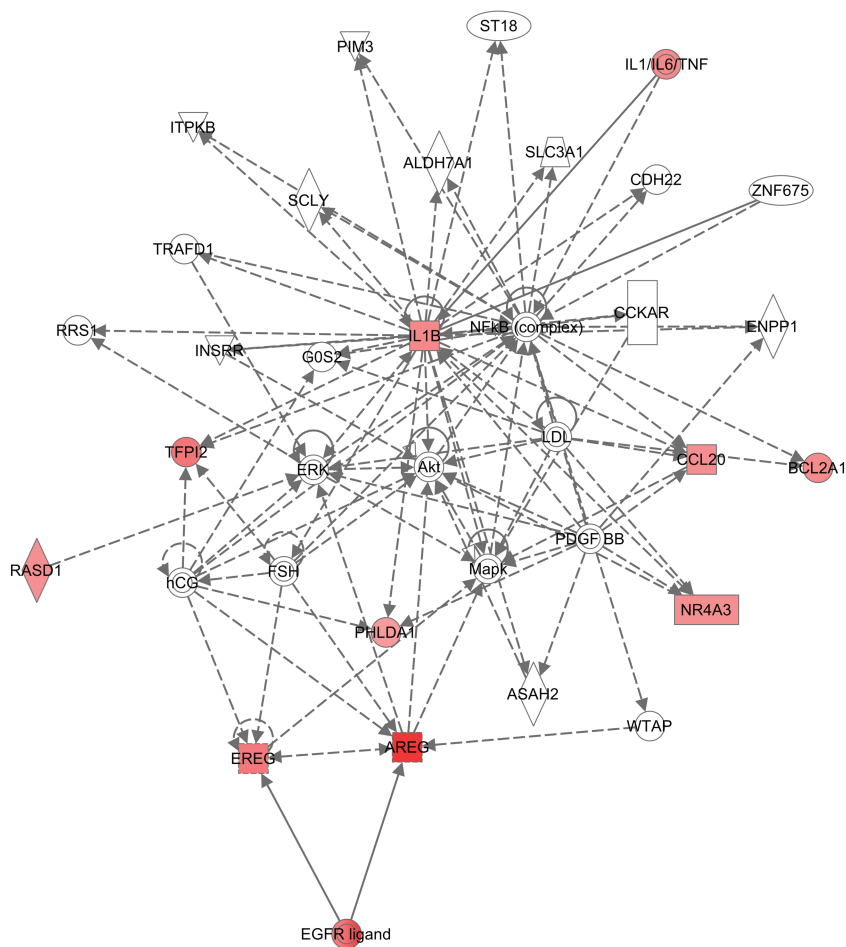

Supplement: S1 (10.1371/journal.pone.0030758.s001) [file journal.pone.0030758.s001]
